# Supplementary material for: Characterization and Evolution of Conserved MicroRNA through Duplication Events in Date Palm (Phoenix dactylifera)
Source: PubMed Central journal article supplement (PMC3738527; doi:10.1371/journal.pone.0071435), 2013-08-08
Supplement: pone.0071435.s001.pdf [file pone.0071435.s001.pdf]

```

pda-miR156a GCTGACAGAAGAGAGTGAGCACATATGGTGTGTTTTCTTGCAATGGGGAGGGAGACTCCATGCTCGAAACTATTTGTGCTCACTTCTCTGTCTGTCAGC
pda-miR156b GTTGACAGAAGAGAGTGAGCACCCATGGTG-CTTTCTTGCAAT-----GGCTTCATGCTCGAAGCTATGTGTGCCCACTTCTCTTTCTGTCAAC

pda-miR156a GCTGACAGAAGAGAGTGAGCACATATGGTGTGTTTTCTTGCAATGGGGAGGGAGACTCCATGCTCGAAACTATTTGTGCTCACTTCTCTGTCTGTCAGC
pda-miR156g GCTGACAGAAGAGAGTGAGCACATATGGTGTGTTTT-CTTGCAATGGGG--GGAGAGTCCATGCTCGAAGCTATTTGTGCTCACTTCTCTGTCTGTCAGC

pda-miR156g GCTGACAGAAGAGAGTGAGCACATATGGTGTGTTTTCTTGCAATGGGGGAGAGTCCATGCTCGAAGCTATTTGTGCTCACTTCTCTGTCTGTCAGC
pda-miR156b GTTGACAGAAGAGAGTGAGCACCCATGGTGCTTTCTTGCAATGGC-----TTCATGCTCGAAGCTATGTGTGCCCACTTCTCTTTCTGTCAAC

```

**Figure S1 Blast2 alignments for pre-miRNA sequences of pda-miRNA156a, pda-miRNA156b and pda-miRNA156g.**
