# Supplementary material for: Characterization and Evolution of Conserved MicroRNA through Duplication Events in Date Palm (Phoenix dactylifera)
Source: PubMed Central journal article supplement (PMC3738527; doi:10.1371/journal.pone.0071435), 2013-08-08
Supplement: pone.0071435.s002.pdf [file pone.0071435.s002.pdf]

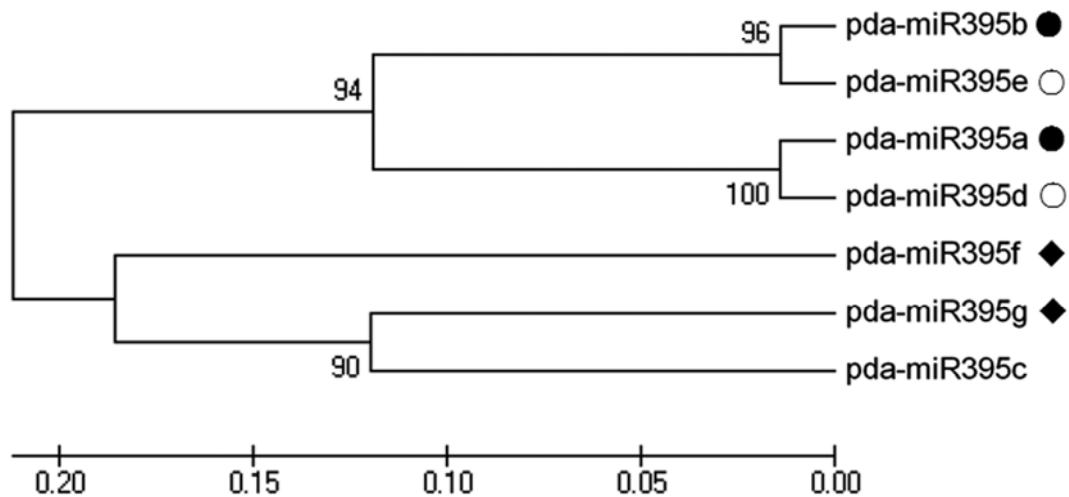

**Figure S2. Phylogenetic analysis of microRNA395 pre-miRNAs in date palm (*Phoenix dactylifera*).** Phylogenetic tree was formed by Neighbor Joining. The same symbols (●, ○, ◆) on the left of the miRNAs represent pairs miRNAs belong to tandem duplications.
