# Supplementary material for: Characterization and Evolution of Conserved MicroRNA through Duplication Events in Date Palm (Phoenix dactylifera)
Source: PubMed Central journal article supplement (PMC3738527; doi:10.1371/journal.pone.0071435), 2013-08-08
Supplement: pone.0071435.s003.pdf [file pone.0071435.s003.pdf]

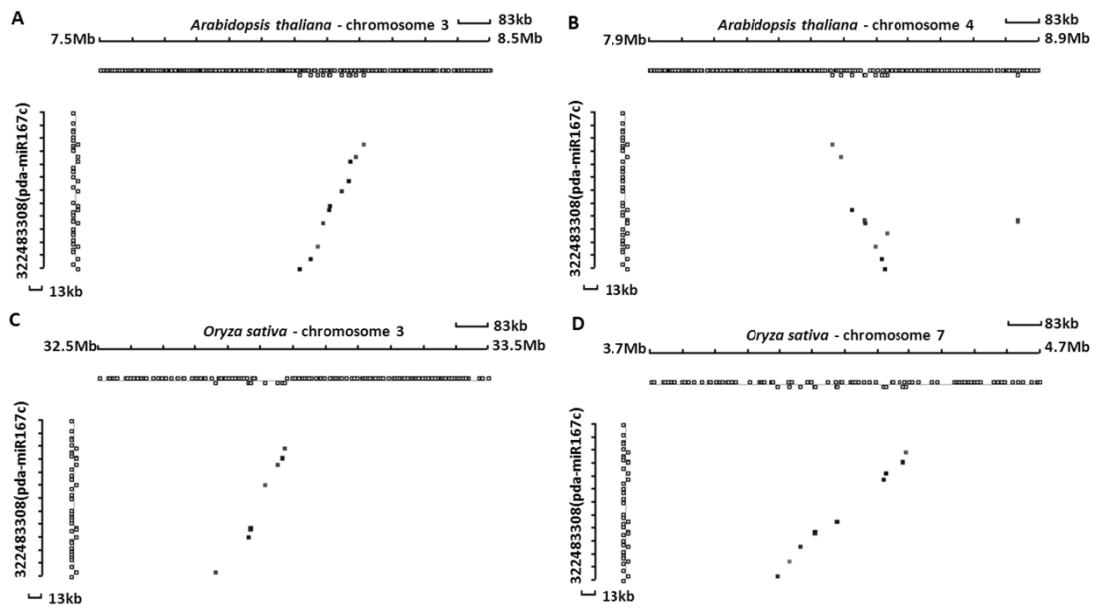

**Figure S3 Conserved protein coding genes between date contigPDK\_30s943301 (Accession: 322483308, pda-miR167c located) and *Arabidopsis thaliana*/*Oryza sativa*.** A - B) Conserved protein coding genes between date palm contigPDK\_30s943301 and *Arabidopsis thaliana* chromosomes 3 and 4. C - D) Conserved protein coding genes between date palm contigPDK\_30s943301 and *Oryza sativa* chromosomes 3 and 7.
