# Supplementary material for: Characterization and Evolution of Conserved MicroRNA through Duplication Events in Date Palm (Phoenix dactylifera)
Source: PLoS One. 2013 Aug 8;8(8):e71435. doi: 10.1371/journal.pone.0071435 (PMC3738527; doi:10.1371/journal.pone.0071435)
Supplement: Table S4 — Recently duplicated miRNAs pairs in seven well-studied plants. (XLS) [file pone.0071435.s007.xls]

## Sheet: Table S4
Table S4 Recently duplicated miRNAs pairs in seven well-studued plants
Species	miRNA family	miRNA-codeb	miRBase-IDc	miRNA-code	miRBase-ID	chromosome
Arabidopsis thaliana(1)a	miR156	13		14		Chr5/Chr5
Citrus sinensis (14)	miR156	98		99		Chr2/Chr2
		98		100		Chr2/Chr2
		98		101		Chr2/Chr2
		99		100		Chr2/Chr2
		99		101		Chr2/Chr2
		100		101		Chr2/Chr2
	miR159	118		125		Chr7/ChrUn
	miR166	142/143		144/145		ChrUn/ChrUn
	miR169	187		188/189		Chr7/Chr7
	miR171	193		200		Chr2/ChrUn
	miR395	216		220		Chr5/Chr5
	miR396	227		223	csi-MIR396c	Chr3/Chr1
		231		236		Chr5/ChrUn
	miR482	252		253		Chr2/Chr2
Glycine max (57)	miR156	260	gma-MIR156v	264	gma-MIR156w	Gm04/Gm06
		261	gma-MIR156h	265	gma-MIR156k	Gm04/Gm06
		266	gma-MIR156l	269	gma-MIR156m	Gm07/Gm09
		277	gma-MIR156n	282	gma-MIR156o	Gm14/Gm17
	miR159	287	gma-MIR319h	312	gma-MIR319e	Gm02/Gm14
		288		296		Gm04/Gm06
		316	gma-MIR159f	297		Gm16/Gm07
		309	gma-MIR319n	320	gma-MIR319l	Gm13/Gm17
		314		322		Gm15/Gm19
	miR160	324		331	gma-MIR160c=e	Gm03/Gm19
		325		329		Gm09/Gm15
		326	gma-MIR160f	328	gma-MIR160d	Gm10/Gm13
	miR162	333		335	gma-MIR162b=c	Gm05/Gm17
	miR164	337	gma-MIR164e	343	gma-MIR164b	Gm02/Gm10
		339	gma-MIR164f	347	gma-MIR164j	Gm03/Gm19
		340	gma-MIR164g	348	gma-MIR164a	Gm03/Gm19
	miR166	351	gma-MIR166i	368	gma-MIR166g	Gm02/Gm10
		356/357	gma-MIR166n	364/365	gma-MIR166b	Gm05/Gm08
		362	gma-MIR166c	371	gma-MIR166a	Gm07/Gm16
		369	gma-MIR166f	375	gma-MIR166d	Gm10/Gm20
		372		374	gma-MIR166k	Gm16/Gm19
	miR167	378		382	gma-MIR167a	Gm03/Gm19
		380	gma-MIR167h	384	gma-MIR167g=j	Gm10/Gm20
		381	gma-MIR167f	383	gma-MIR167e=i	Gm10/Gm20
	miR168	385	gma-MIR168a	386	gma-MIR168b	Gm01/Gm09
	miR169	396/397/398/399/400	gma-MIR169h	414/415/416/417		Gm09/Gm15
		404/405/406	gma-MIR169i	419/420	gma-MIR169r	Gm13/Gm17
		408	gma-MIR169v	423		Gm13/Gm19
	miR171	429	gma-MIR171e	435	gma-MIR171u	Gm05/Gm08
		432	gma-MIR171i	438	gma-MIR171a	Gm06/Gm12
		433	gma-MIR171t	437	gma-MIR171m	Gm06/Gm12
		434	gma-MIR171c	446	gma-MIR171q	Gm07/Gm17
		447	gma-MIR171k=l	440		Gm17/Gm13
	miR172	449		458	gma-MIR172d	Gm10/Gm14
		449		462		Gm10/Gm19
		451	gma-MIR172h	463	gma-MIR172j	Gm10/Gm20
		452	gma-MIR172f	454	gma-MIR172a	Gm11/Gm12
		453	gma-MIR172e	461	gma-MIR172c	Gm11/Gm18
		455	gma-MIR172k	456	gma-MIR172b	Gm12/Gm13
		458	gma-MIR172d	462		Gm14/Gm19
	miR390	465	gma-MIR390d	468	gma-MIR390b	Gm02/Gm14
	miR393	471	gma-MIR393b	474	gma-MIR393d	Gm01/Gm10
		471	gma-MIR393b	480	gma-MIR393g	Gm01/Gm20
		472	gma-MIR393c	477	gma-MIR393e	Gm02/Gm14
		473	gma-MIR393h	478	gma-MIR393j	Gm09/Gm16
		474	gma-MIR393d	480	gma-MIR393g	Gm10/Gm20
	miR394	482	gma-MIR394c	484	gma-MIR394g	Gm04/Gm06
		483	gma-MIR394e	485	gma-MIR394f	Gm05/Gm08
	miR395	495/496	gma-MIR395j	500/501	gma-MIR395m	Gm01/Gm02
	miR396	517		524		Gm07/Gm16
	miR397	532	gma-MIR397a	533	gma-MIR397b	Gm08/Gm13
	miR398	535	gma-MIR398b	534	gma-MIR398a	Gm02/Gm01
		536		538		Gm02/Gm14
	miR399	539/540/541		543/544/545/546		Gm05/Gm08
		548/549		554/555		Gm09/Gm16
		552		553		Gm13/Gm15
	miR408	561	gma-MIR408b	563	gma-MIR408d	Gm03/Gm19
Malus domestica(25)	miR156	578	mdm-MIR156f	582	mdm-MIR156k	Chr2/Chr8
	miR159	585		587		Chr10/Chr11
		585		590	mdm-MIR319a=b	Chr10/Chr14
		586		595		Chr11/Chr3
		590	mdm-MIR319a=b	587		Chr14/Chr11
	miR166	617	mdm-MIR166c	621	mdm-MIR166e=i	Chr10/Chr5
		616		623		Chr1/Chr7
	miR167	624/625	mdm-MIR167c	629/630	mdm-MIR167d	Chr11/Chr3
		626	mdm-MIR167g	631	mdm-MIR167f	Chr12/Chr4
		628	mdm-MIR167a=h=i	627	mdm-MIR167j	Chr16/Chr13
	miR169	636/637		640	mdm-MIR169e=f	Chr17/Chr9
		638		642		Chr17/Chr9
		641		642		Chr9/Chr9
	miR171	647		650		Chr14/Chr6
		648		651	mdm-MIR171f	Chr17/Chr9
	miR172	655	mdm-MIR172i=j=k	656	mdm-MIR172d=f=l	Chr13/Chr3
	miR393	661	mdm-MIR393b=c=d=e	662	mdm-MIR393b=c=d=e	Chr1/Chr1
		661	mdm-MIR393b=c=d=e	664	mdm-MIR393a	Chr1/Chr7
		662	mdm-MIR393b=c=d=e	664	mdm-MIR393a	Chr1/Chr7
	miR394	665		666		Chr12/Chr13
		665		667		Chr12/Chr5
		667		666		Chr5/Chr13
	miR395	669/670/671	mdm-MIR395a	673		Chr13/Chr16
	miR397	678	mdm-MIR397b	680	mdm-MIR397a	Chr10/Chr5
	miR398	681		684		Chr1/Chr5
Oryza sativa(6)	miR156	710	osa-MIR156f	711		Chr8/Chr8
	miR164	735	osa-MIR164e	738	osa-MIR164f	Chr3/Chr5
	miR167	758	osa-MIR167a	763	osa-MIR167c	Chr12/Chr3
	miR395	804	osa-MIR395a	805/806	osa-MIR395m	Chr4/Chr4
		804	osa-MIR395a	809/810	osa-MIR395u	Chr4/Chr9
		809/810	osa-MIR395u	805/806	osa-MIR395m	Chr9/Chr4
Populus trichocarpa(43)	miR156	848		847	ptc-MIR156i	Chr12/Chr12
		853		854		Chr18/Chr18
	miR159	859	ptc-MIR159c	860	ptc-MIR159a	Chr12/Chr12
		848		871		Chr12/Chr17
		871		872		Chr17/Chr17
		874	ptc-MIR319d	864	ptc-MIR319c	Chr19/Chr13
	miR160	876	ptc-MIR160e	881	ptc-MIR160f	Chr06/Chr16
	miR166	893	ptc-MIR166c	901	ptc-MIR166j=k	Chr02/Chr14
		893	ptc-MIR166c	902		Chr02/Chr14
		899	ptc-MIR166i	903	ptc-MIR166l	Chr12/Chr15
		901	ptc-MIR166j=k	902		Chr14/Chr14
	miR169	917		932	ptc-MIR169ag	Chr01/Chr09
		918/919	ptc-MIR169q	931	ptc-MIR169v	Chr01/Chr09
	miR171	953	ptc-MIR171c	964	ptc-MIR171d	Chr06/Chr18
		959	ptc-MIR171g	963	ptc-MIR171h	Chr12/Chr15
	miR172	974	ptc-MIR172g	970	ptc-MIR172h	Chr10/Chr08
	miR390	977	ptc-MIR390b	979	ptc-MIR390d	Chr06/Chr16
	miR396	994/995	ptc-MIR396a	998/999	ptc-MIR396b	Chr06/Chr18
	miR397	1001		1002		Chr04/Chr09
	miR398	1004	ptc-MIR398b	1005	ptc-MIR398c	Chr01/Chr09
	miR399	1010/1011/1012	ptc-MIR399e	1014/1015/1016	ptc-MIR399d	Chr04/Chr04
Solanum lycopersicum(11)	miR169	1095/1096		1108		Chr03/Chr08
	miR395	1144		1145		ChrUn/ChrUn
		1144		1146		ChrUn/ChrUn
		1144		1147/1148		ChrUn/Chr02
		1145		1146		ChrUn/ChrUn
		1145		1147		ChrUn/Chr02
		1145		1156/1157		ChrUn/Chr03
		1146		1147		ChrUn/Chr02
		1146		1158/1159/1160/1161	sly-MIR395a	ChrUn/Chr05
		1147/1148		1150/1151/1152		Chr02/Chr02
		1150/1151/1152		1154/1155		Chr02/Chr02
aNumber of duplicated miRNA pairs.
bmiRNA code in this study which were listed in Table S1.
csame miRBase in miRBase ver19.
